# Supplementary material
Source: PubMed Central journal article supplement (PMC7973348)
Supplement: 12250_2020_230_MOESM1_ESM.pdf [file 12250_2020_230_MOESM1_ESM.pdf]

## Electronic Supplementary Material

### On the Calculation of TCID<sub>50</sub> for Quantitation of Virus Infectivity

Chengfeng Lei<sup>1</sup> • Jian Yang<sup>1,2</sup> • Jia Hu<sup>1</sup> • Xiulian Sun<sup>1</sup>✉

1. Wuhan Institute of Virology, Center for Biosafety Mega-Science, Chinese Academy of Sciences, Wuhan 430071, China

2. University of Chinese Academy of Sciences, Beijing 100049, China

Supporting information to DOI: 10.1007/s12250-020-00230-5

**Fig. S1.** TCID<sub>50</sub> calculator.
